# Supplementary material for: Deconvolving the biogeochemical controls on coral Sr/Ca and Ba/Ca proxies: New perspectives from paired stable Ca, Sr and Ba isotope compositions
Source: Copernicus journal article supplement (doi:10.5194/egusphere-2025-4126), 2025-08-29
Supplement: Supplementary file [file egusphere-2025-4126-AC1-supplement.pdf]

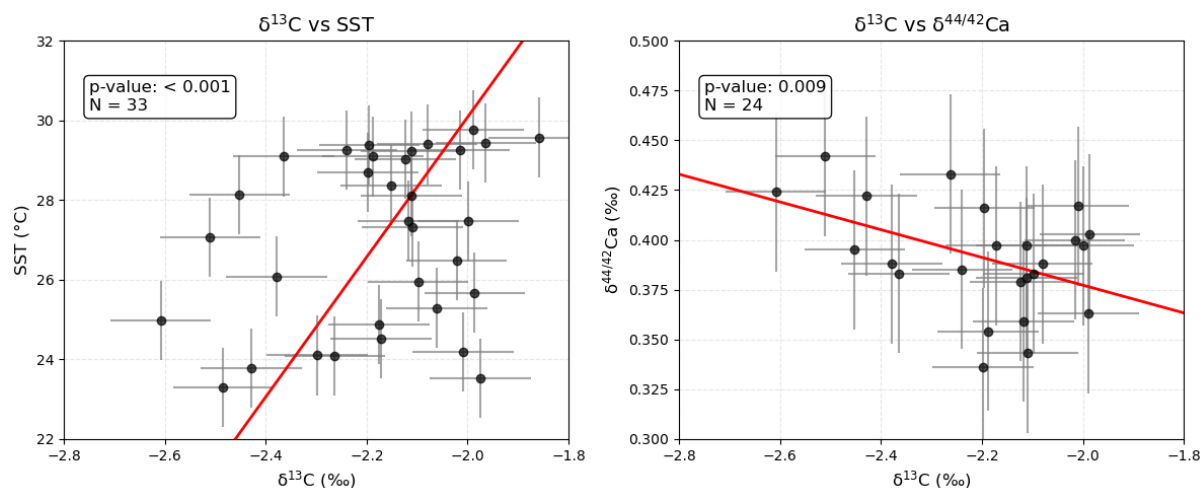

Figure R1: York regression analysis of the relationships between (a) skeletal  $\delta^{13}\text{C}$  vs. SST and (b) skeletal  $\delta^{13}\text{C}$  vs.  $\delta^{44}\text{Ca}$ .

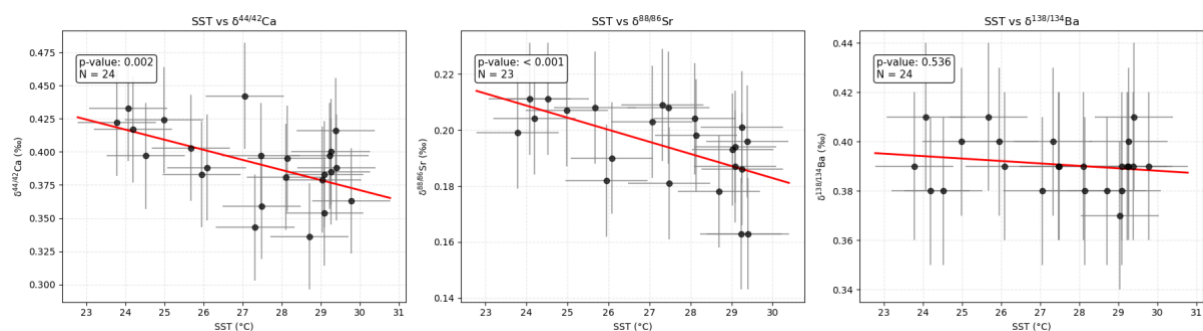

Figure R2: York regression analysis of the relationships between (a) skeletal  $\delta^{44}\text{Ca}$  vs. SST (b) skeletal  $\delta^{88}\text{Sr}$  vs. SST and (c) skeletal  $\delta^{138}\text{Ba}$  vs. SST.
